# Supplementary material
Source: PubMed Central journal article supplement (PMC10293112)
Supplement: NIHMS1869029-supplement-PFM_Exam.pdf [file NIHMS1869029-supplement-PFM_Exam.pdf]

## 1. Assessment of Pelvic Organ Prolapse

- Prolapse present at rest:  No  Yes  
 Prolapse present with Valsalva:  No  Yes  
 Leakage present:  No  Urine  Stool

**Not done, participant declined:**

- Unable to understand instructions  
 Fear of pain exacerbation  
 Increased pain/discomfort at attempt of examination  
 Felt unsafe  
 Other: \_\_\_\_\_

**Not done, evaluator judgement that participant was:**

- At heightened physical risk due to participant's circumstances/abilities  
 At heightened psychological/emotional risk due to participant's circumstances and/or trauma history  
 Participant unable to follow instructions  
 Other: \_\_\_\_\_

## 2. Palpatory Assessment of Pubovisceral (PV) Muscle Integrity

| Right PV Muscle                                                     | Left PV Muscle                                 |
|---------------------------------------------------------------------|------------------------------------------------|
| <input type="checkbox"/> 2 Present                                  | <input type="checkbox"/> 2 Present             |
| <input type="checkbox"/> 1 Equivocal                                | <input type="checkbox"/> 1 Equivocal           |
| <input type="checkbox"/> 0 Not Palpable/absent                      | <input type="checkbox"/> 0 Not Palpable/absent |
| Indicate relevance of muscle bulk by each side                      |                                                |
| <input type="checkbox"/> Both sides equal                           |                                                |
| <input type="checkbox"/> Right side muscle bulk more than Left side |                                                |
| <input type="checkbox"/> Left side muscle bulk more than Right side |                                                |

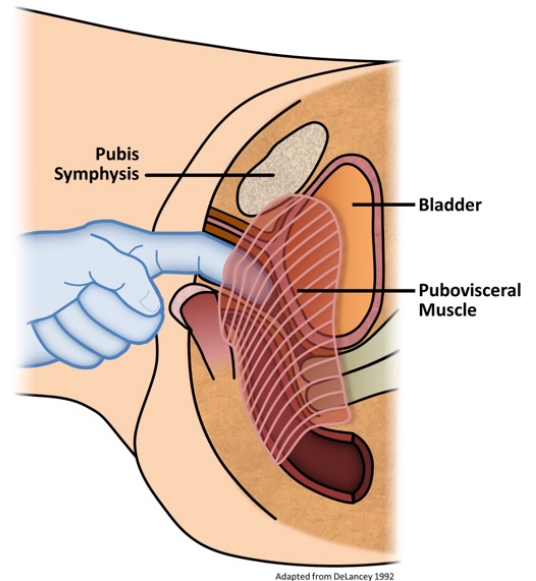

Did the PV muscle assessment provoke pain?  Yes  No

**Not done, participant declined:**

- Unable to understand instructions  
 Fear of pain exacerbation  
 Increased pain/discomfort at attempt of examination  
 Felt unsafe  
 Other: \_\_\_\_\_

**Not done, evaluator judgement that participant was:**

- At heightened physical risk due to participant's circumstances/abilities  
 At heightened psychological/emotional risk due to participant's circumstances and/or trauma history  
 Participant unable to follow instructions  
 Other: \_\_\_\_\_

### 3. Pelvic Floor Muscle (PFM) Evaluation

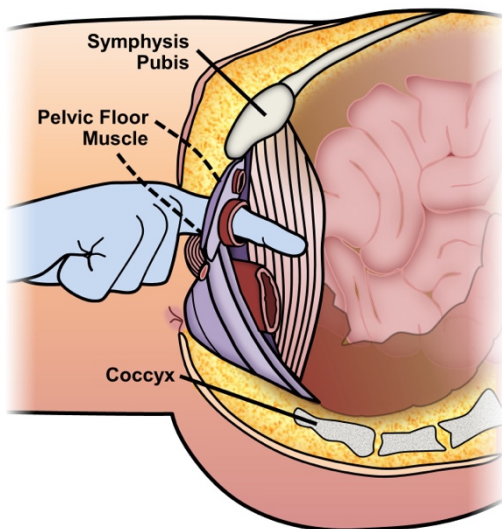

|                |                                                                          | Right PFM<br>Strength<br>Score<br>(choose one<br>number) | Left PFM<br>Strength<br>Score<br>(choose one<br>number) | Midline PFM<br>Strength<br>Score<br>(choose one<br>number) |
|----------------|--------------------------------------------------------------------------|----------------------------------------------------------|---------------------------------------------------------|------------------------------------------------------------|
| No contraction | No discernable muscular contraction                                      | <input type="checkbox"/> 0                               | <input type="checkbox"/> 0                              | <input type="checkbox"/> 0                                 |
| Flicker        | Very slight muscular contraction                                         | <input type="checkbox"/> 1                               | <input type="checkbox"/> 1                              | <input type="checkbox"/> 1                                 |
| Weak           | An increase in tension is detected, without any discernible lift         | <input type="checkbox"/> 2                               | <input type="checkbox"/> 2                              | <input type="checkbox"/> 2                                 |
| Moderate       | Lifting of the muscle belly with elevation of the posterior vaginal wall | <input type="checkbox"/> 3                               | <input type="checkbox"/> 3                              | <input type="checkbox"/> 3                                 |
| Good with lift | Increased tension, good contraction elevating the posterior vaginal wall | <input type="checkbox"/> 4                               | <input type="checkbox"/> 4                              | <input type="checkbox"/> 4                                 |
| Strong         | Finger is squeezed and drawn into the vagina                             | <input type="checkbox"/> 5                               | <input type="checkbox"/> 5                              | <input type="checkbox"/> 5                                 |

 **Not done, participant declined:**

- Unable to understand instructions
- Fear of pain exacerbation
- Increased pain/discomfort at attempt of examination
- Felt unsafe
- Other: \_\_\_\_\_

 **Not done, evaluator judgement that participant was:**

- At heightened physical risk due to participant's circumstances/abilities
- At heightened psychological/emotional risk due to participant's circumstances and/or trauma history
- Participant unable to follow instructions
- Other: \_\_\_\_\_

## 4. Obturator Internus and Levator Ani Myofascial Pain Screening Examination

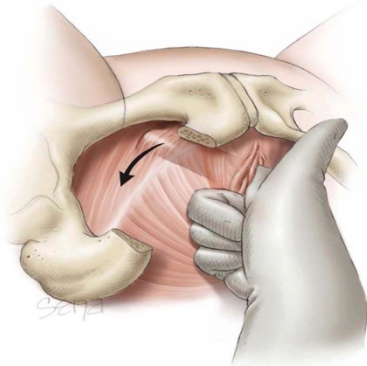

Obturator Internus

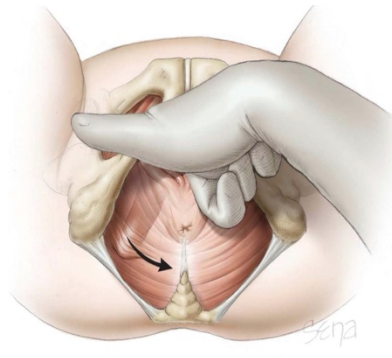

Levator Ani

| 0-10 scale | Pain Rating       |
|------------|-------------------|
| 0          | Pressure, no pain |
| 1-3        | Mild pain         |
| 4-6        | Moderate pain     |
| 7-10       | Severe pain       |

RIGHT obturator internus: \_\_\_\_/10

RIGHT levator ani: \_\_\_\_/10

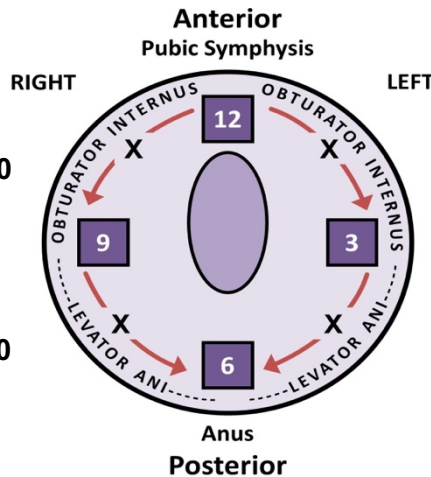

LEFT obturator internus: \_\_\_\_/10

LEFT levator ani: \_\_\_\_/10

 Not done, participant declined:

- Unable to understand instructions
- Fear of pain exacerbation
- Increased pain/discomfort at attempt of examination
- Felt unsafe
- Other: \_\_\_\_\_

 Not done, evaluator judgement that participant was:

- At heightened physical risk due to participant's circumstances/abilities
- At heightened psychological/emotional risk due to participant's circumstances and/or trauma history
- Participant unable to follow instructions
- Other: \_\_\_\_\_

**Evaluator Name and Signature**

Evaluator Name: \_\_\_\_\_ Evaluator Signature: \_\_\_\_\_
